1 Validation of an automated segmentation algorithm for lower leg MR images, applied to sodium  
2 quantification

3  
4 Jasmine M. Greer<sup>1¶#a\*</sup>, Ping Wang<sup>1&</sup>, Serpil Muge Deger<sup>3,4&</sup>, Aseel Alsouqi<sup>3,4&</sup>, T. Alp  
5 Ikizler<sup>3,4&</sup>, Jens M. Titze<sup>2&</sup>, Baxter P. Rogers<sup>1¶</sup>

6  
7 <sup>1</sup> Department of Radiology and Radiological Sciences, Vanderbilt University Institute of Imaging  
8 Science, Nashville, Tennessee, United States of America

9 <sup>2</sup> Department of Medicine, Division of Clinical Pharmacology, Vanderbilt University Medical  
10 Center, Nashville, Tennessee, United States of America

11 <sup>3</sup> Department of Medicine, Division of Nephrology and Hypertension, Vanderbilt University  
12 Medical Center, Nashville, Tennessee, United States of America

13 <sup>4</sup> Department of Medicine, Division of Nephrology, Vanderbilt Center for Kidney Disease,  
14 Nashville, Tennessee, United States of America

15  
16 <sup>#a</sup> Current Address: Department of Radiology and Radiological Sciences, Vanderbilt University  
17 Institute of Imaging Science, Nashville, Tennessee, United States of America

18  
19 \* Corresponding author

20 E-mail: [jasmine.m.greer.1@vanderbilt.edu](mailto:jasmine.m.greer.1@vanderbilt.edu) (JMG)

21  
22 ¶ These authors contributed equally to this work.

23 & These authors contributed equally to this work.

## 24 **Abstract**

25 **Objective:** To develop and validate an automated segmentation algorithm for the lower  
26 leg using a multi-parametric magnetic resonance imaging protocol.

27 **Methods:** An automated algorithm combining active contour and intensity-based  
28 thresholding methods was developed to identify skin and muscle regions from proton Dixon MR  
29 images of the lower leg. Tissue sodium concentration was then computed using  
30 contemporaneously acquired sodium images with calibrated phantoms in the field of view.  
31 Resulting sodium concentration measurements were compared to a gold standard manual  
32 segmentation in 126 scans.

33 **Results:** Most cases had no observable errors in segmentation of muscle and skin. Six cases  
34 had minor errors that were not expected to affect quantification; in the worst, 126 mm<sup>2</sup> (2%) of a  
35 muscle area of 8,042 mm<sup>2</sup> was misclassified. In one case the algorithm failed to separate the tibia  
36 from the muscle compartment. Correlation between automated and manual measurements of  
37 sodium concentration was  $R^2 = 0.84$  for skin,  $R^2 = 0.99$  for muscle. Additionally, the RMSE was  
38 2.4mM for skin and 0.5mM for muscle; the observed physiological range was 8.5 to 37.4mM.

39 **Conclusion:** For the purpose of estimating sodium concentrations in muscle and skin  
40 compartments, the automated segmentations provided equally accurate results compared to the  
41 more time-intensive manual segmentations. Sodium quantification serves as a biomarker for  
42 disease progression, which would assist with early diagnostic treatments. The proposed algorithm  
43 will improve workflow, reproducibility, and consistency in such studies.

44  
45  
46  
47  
48

## 49 **Introduction**

50 With technological advancements, biomedical application of sodium (Na) magnetic  
51 resonance imaging is on the rise, as it provides unique and quantitative biochemical information  
52 related to tissue viability, cell integrity and function [1-7]. The lower leg muscle and skin is of  
53 particular interest because of the technical simplicity and speed of obtaining an MRI scan of the  
54 calf [8].

55 A straightforward approach to determine sodium levels based on the sodium magnetic  
56 resonance images of the calf is to manually segment the desired regions. This process requires  
57 meticulous attention and inconsistencies can be introduced via human error, which diminishes  
58 reproducibility.

59 An automated approach could address these problems, and consequently improve  
60 workflow. A variety of automated methodologies have been developed to segment anatomical  
61 magnetic resonance images of the leg. One approach has been to apply a fuzzy clustering method  
62 to segment anatomical regions such as adipose tissue, cortical bone, and spongy bone in the lower  
63 musculature of the leg [9] and in the thigh [10]. For segmentation, other studies use a combination  
64 of applications including: shaping histograms, adaptive thresholding, connectivity [11], a  
65 deformable model, global histogram based intensity thresholding, k means clustering [12], and  
66 intensity based temporal homomorphic filter [13].

67 In this study, we develop an application-specific automated segmentation pipeline for the  
68 lower leg and show that its segmentations applied to sodium MR images yield sodium  
69 concentration measurements comparable to the measurements obtained via the gold standard  
70 manual segmentations.

## 71 **Materials and Methods**

### 72 **Participants**

73 We conducted a study of 93 people who had formerly participated in a variety of sodium  
74 MRI studies in Vanderbilt University Medical Center between July 2014 and May 2017 and had  
75 data available with  $^{23}\text{Na}$ MRI readings. Our study sample included pre-hypertensive patients,  
76 maintenance hemodialysis patients, maintenance peritoneal dialysis patients, and controls. 31  
77 people were scanned twice on separate occasions, while the remaining population was scanned  
78 once, in total 126 scans were acquired. The Institutional Review Board approved the study  
79 protocol and written informed consent was obtained from all study patients. The procedures were  
80 in accordance with the Declaration of Helsinki Principles regarding ethics of human research.

### 81 **MR Imaging**

82 MR images were acquired on a Philips Achieva 3.0T MR scanner (Philips Healthcare,  
83 Cleveland OH, USA) using a  $^{23}\text{Na}$  quadrature knee coil (Rapid Biomedical GmbH, Rimpar,  
84 Germany). The left lower leg was placed in the coil, in close proximity to a set of calibration  
85 phantoms (NaCl aqueous solution of 10mM, 20mM, 30mM, and 40mM). Two proton scans were  
86 performed using the scanner body coil: a mDixon scan for fat and water images, and a standard  
87 proton-density-weighted image. These proton scans have the same geometry parameters: FOV =  
88  $192 \times 192 \text{ mm}^2$ , resolution =  $1 \times 1 \text{ mm}^2$ , 5 slices at a thickness of 6 mm. The proton mDixon  
89 scan was acquired with TR = 200 ms and TE = 4.6 ms, 20 images were constructed in the form  
90 of water, water fat in-phase, water fat out-of-phase, and fat images, scan time = 3 min 52 s. The  
91 standard proton-density-weighted scan used the following parameters: TR/TE/FA = 4000 ms/ 30  
92 ms/  $90^\circ$ , and scan time = 2 min 32 s. Using the sodium coil and an optimized 3D gradient-echo

93 sequence, a sodium image was obtained with the following parameters: FOV = 192 x 192 x 210  
94 mm<sup>3</sup>, voxel size = 3 x 3 x 30 mm<sup>3</sup>, 7 slices, TR/TE/FA = 130 ms/0.99 ms/90°, bandwidth = 434  
95 Hz/pixel, acquisition: 26, and scan time = 15 min 54 s [5].

## 96 **Manual Segmentation**

97 Manual segmentation followed a previously described protocol [5]. The central imaging  
98 slices of the mDixon and sodium scans were used for manual segmentation. Five muscle regions  
99 of interest (anterior compartment, peroneus, soleus, medial gastrocnemius, and lateral  
100 gastrocnemius) were drawn on the mDixon, while a small region of the skin and phantoms were  
101 drawn on the sodium image (Fig. 1).

102

103 **Fig 1: Example of manual segmentation.** Four phantoms with sodium concentrations of  
104 10mM, 20mM, 30mM, and 40mM, a background sample, skin, and 5 muscle regions were  
105 overlaid on a water image.

106

## 107 **Automated Segmentation**

108 Image analysis was performed in MATLAB version 2016a (Mathworks, Natick, MA)  
109 using an XNAT data management platform [14].

110 Regions of interest were identified by applying an active contour model and a global  
111 histogram based intensity thresholding method. Active contour is an energy minimizing model  
112 that uses deformable curves to match the desired object [15]. First, the edges of the image are  
113 determined via application of

$$114 \quad g(x,y) = \frac{1}{1 + |\nabla(G_o * I)|^2} \quad (1)$$

115 where “ $G_0$ ” represents the image and “ $I$ ” represents the smoothing factor. The curves that shape  
116 the object are then minimized in order to closely identify the desired object. This is achieved by  
117 integrating the edge indicator function using calculus of variance

$$118 \quad \frac{dC}{dt} = (g(I)(c + \kappa) - \langle \nabla g, \vec{N} \rangle) \vec{N} \quad (2)$$

119 which yields a mask of the desired object. More simply stated, the active contour model can be  
120 thought of as creating a basic shape that encloses the object, then progressively moving closer to  
121 the object until it reaches the edge, shaping the object’s boundary (Fig 2).

122

123 **Fig 2. Basic illustration of the active contour method.** A stepwise framework to illustrate the  
124 process of identifying an object outline.

125

126 The global histogram based intensity thresholding (Otsu’s method) is also used in this  
127 algorithm [16]. This method identifies a threshold that separates a bimodal intensity based  
128 histogram into two classes. In order to determine this threshold, the global histogram based  
129 intensity thresholding algorithm determines the thresholding that yields the smallest weighted  
130 variance of the two classes,

$$131 \quad \sigma_w^2(t) = \omega_0(t)\sigma_0^2(t) + \omega_1(t)\sigma_1^2(t) . \quad (3)$$

132 As illustrated in Fig 3, this thresholding approach distinguishes between the two groups of a  
133 bimodal histogram in order to produce a binary object.

134

135 **Fig 3. Basic illustration of global histogram based intensity thresholding.** A water-only  
136 image derived from the mDixon scan was applied to an image intensity histogram to create two  
137 classes.

138

139           The automated quantification algorithm can be divided into four main phases: leg and  
140 phantom segmentation, skin segmentation, muscle segmentation, and quantification of sodium  
141 concentration.

142           First, using the proton-density weighted image (Fig 4a) a 400-iteration active contour  
143 Chan-Vese method [15] was used to identify the leg portion of the mask and phantoms from the  
144 background (Fig. 4b). Nature of each segmented region was determined automatically based on  
145 size (leg  $>2400 \text{ mm}^2$ , phantoms  $<1300 \text{ mm}^2$ ).

146

147 **Fig. 4. Creation and application of mask from MR images.** (A) Proton density image, (B)  
148 mask of leg and phantom regions, (C) mask of skin region, (D) reduced skin mask, (E) reduced  
149 skin mask overlaid on sodium image, (F) Otsu thresholding of the water image, (G) smoothed  
150 muscle region, (H) phantom, skin, and muscle regions overlaid on water image, and (I) phantom,  
151 skin, and muscle regions overlaid on sodium image.

152

153           The skin region was estimated by eroding the leg portion of the mask (Fig. 4b) by a 4 mm  
154 radius circular kernel and subtracting the resulting image from the original leg portion of the  
155 mask (Fig. 4b) to select approximately the outer 4 mm of the leg region (Fig. 4c). It should be  
156 noted that this process assumes the skin thickness is similar in all participants. At the time of MR  
157 acquisition, the posterior area of the leg was resting on the phantom holder surface and thus  
158 aligned perpendicular to the slice direction such that through-plane partial volume effect was  
159 minimized [22]. Therefore, the skin region was reduced to include only the portion in contact  
160 with the surface of the phantom holder (Fig. 4d). The reduced skin region was parallel to the coil

161 surface and the tissue thickness was more stable. Then, the produced image was overlaid on the  
162 sodium image (Fig. 4e) [17, 18].

163 The muscle region was identified on the water-only image derived from the mDixon scan  
164 (Fig. 3a) using a two-class global histogram based intensity thresholding method (Fig. 3) [19].  
165 The estimated classification threshold was then reduced by 50% to account for intensity  
166 inhomogeneity in the image. Both the resulting two class image (Fig. 4f) and the leg portion of  
167 the mask (Fig. 4b) which was eroded by a 2 mm radius circular kernel, were used to create a  
168 three class intensity based leg image. By utilizing the index values for identification purposes,  
169 the region that included the muscle was isolated. Following erosion by a 1 mm radius circular  
170 kernel, size based artifact removal, and dilation by a 1 mm radius circular kernel, all remain  
171 holes within the muscle region were filled. The extracted muscle region was smoothed using a  
172 300 iteration Chan-Vese active contour model with a smooth parameter of 1.2. The skin region  
173 (Fig. 4c) was then subtracted from this muscle region to confirm there is no overlap between the  
174 two (Fig. 4g). Then, the four phantoms were uniquely labeled and eroded by a 4 mm radius  
175 circular kernel to ensure proper alignment on the sodium image. The phantoms, skin, and muscle  
176 regions are shown overlaid on the water only image in Figure 4h [17, 18].

## 177 **Calibration for Quantitative Sodium Concentration**

178 To quantify the sodium content in each region, the linear relationship between tissue  
179 intensity and the calibration phantoms was applied. A linear fit was computed using the known  
180 concentrations of the phantoms: 10mM, 20mM, 30mM, and 40mM, and their respective average  
181 sodium image intensity signal to estimate the calibration coefficients. Using these parameters,  
182 the sodium image was calibrated. The regions of interest were then applied to this calibrated



183 sodium image (Fig. 4i) and the mean and median sodium concentrations were quantified [17,  
184 18].

185

## 186 **Results**

### 187 **Participants and Scan Quality**

188 In total, 126 scans were acquired from 93 participants. Three scans were excluded from  
189 the analysis based on technical errors at the time of acquisition: in one case, the phantom holder  
190 was misaligned relative to the leg, while in two cases, the fields of view were misaligned  
191 between sodium and proton scans. Method comparisons were based on the remaining 123 scans.

### 192 **Automatic Segmentation Algorithm Results**

193 Of the 123 usable scans, 94% of the segmentations were highly accurate on visual  
194 inspection, correctly identifying the muscle and skin while excluding the tibia (Fig. 4h-i). 5%  
195 were usable for the intended purpose, identifying the muscle and skin with minor errors and  
196 excluding the tibia (Fig. 5a). We observed that two of the cases with minor errors also had high  
197 amounts of intramuscular fat, e.g. Fig. 5b. And lastly, there was one case in which the tibia was  
198 not excluded (Fig. 5c).

199

200 **Fig. 5. Illustration of automated segmentations special cases.** (A) Example of a minor error,  
201 exclusion of small amount of muscle tissue (arrow). (B) In one case, the tibia was erroneously  
202 included in the muscle region. (C) A case with high level of intramuscular fat.

203

## 204 **Automatic and Manual Segmentation Comparison**

205 Sodium concentrations estimated by the automated algorithm were compared to values  
206 obtained from the gold standard manual segmentation using Bland-Altman analysis (Fig. 6) [20].  
207 The bias for both regions was approximately zero: -0.05 mM for the skin and -0.11 mM for the  
208 muscle. The root mean square error (RMSE) of the automated algorithm compared to gold  
209 standard was 0.5 mM for the muscle, and 2.4 mM for the skin. The range of sodium  
210 concentration values in the muscle and skin regions in the entire sample was 11.3 to 35.0 mM  
211 (muscle) and 8.5 to 37.4 mM (skin). The correlations between automated and manual  
212 measurements were 0.99 and 0.84 for the muscle and skin, respectively. We observed four cases  
213 in the skin region marked in red on Fig. 6a) and three cases in the muscle region (marked in red  
214 on Fig 6b) where the difference between automated and manual measurements was more than  
215 two standard deviations from the mean.

216

217 **Fig. 6. Bland-Altman plots comparing automated and manual measurements of sodium**

218 **concentration in the skin and muscle.** (A) Bland-Altman plot of the skin comparing the  
219 automated and manual measurement differences (y axis) versus the automated and manual  
220 measurement mean (x axis) (sodium range: 8.5-37.4 mM). Discrepancy cases indicated in red.

221 (B) Bland-Altman plot of the muscle, comparing the automated and manual measurement  
222 differences (y axis) versus the automated and manual measurement mean (x axis) (sodium range:  
223 11.3-35.0 mM). Discrepancy cases indicated in red.

224

## 225 **Automatic and Manual Segmentation Inter-Scan Comparison**

226 Of the 123 used scans, 31 subjects were scanned twice. Using the Bland-Altman analysis  
227 (Fig6) [20], the inter-scan comparison was evaluated. The bias for both methods and both  
228 regions were approximately zero. In all cases, bias was below 1.05 and 95% limits of agreement  
229 were less than +/-10 mM. The limits of agreement for the automated method of the muscle was [-  
230 4.50, 4.87], the manual method of the muscle was [-4.91, 5.44], the automated method of the  
231 skin was [-4.87, 5.12], and the manual method of the skin was [-5.91, 8.01].

232

233 **Fig 7. Bland-Altman plots comparing sodium concentration measurement concentration in**  
234 **the skin and muscle before and after the study.** (A) Bland-Altman plot of the muscle region,  
235 identified by the automated method, comparing the baseline and follow-up measurement  
236 differences (y axis) versus the sodium median from the automated method (x axis) (sodium  
237 range: 12.9-25.2 mM). (B) Bland-Altman plot of the muscle region, identified by the manual  
238 method, comparing the baseline and follow-up measurement differences (y axis) versus the  
239 sodium mean from the manual method (x axis) (sodium range: 12.7-25.8 mM). (C) Bland-  
240 Altman plot of the skin region, identified by the automated method, comparing the baseline and  
241 follow-up measurement differences (y axis) versus the sodium median from the automated  
242 method (x axis) (sodium range: 8.32-21.3 mM). (D) Bland-Altman plot of the skin region,  
243 identified by the manual method, comparing the baseline and follow-up measurement differences  
244 (y axis) versus the sodium mean from the manual method (x axis) (sodium range: 8.72-24.8  
245 mM).

246

## 247 **Discussion**

248           In this study, we aimed to develop an algorithm that would allow us to streamline  
249  $^{23}\text{Na}$ MRI readings of the lower leg. Our data suggest that the sodium concentration  
250 measurements obtained by the automated segmentation were of excellent quality, adequate to  
251 replace those obtained by the gold standard manual segmentation method.

252           Seven cases fell outside the limits of agreement in the Bland-Altman analysis, indicating  
253 that these cases had a relatively large discrepancy between manual and automated results: four  
254 were in skin and three cases in muscle. For the manual segmentation of the skin region, we  
255 observed variability from one case to the next in how much skin versus background was included  
256 in the final region, and in the thickness of the manually drawn skin region. This is a challenging  
257 segmentation task even when the regions are directly drawn on the sodium image [5], because  
258 the skin (~2 mm thick) is poorly resolved at the 3 x 3 mm in-plane voxel size. The automated  
259 method sacrificed any improvement in accuracy related to using the sodium image intensity to  
260 define boundaries; however, it added substantial consistency in positioning and thickness due to  
261 the use of the higher resolution structural images. Three of the four cases where skin results were  
262 outside the limits of agreement (Fig. 6a) showed erroneous inclusion of background voxels or  
263 exclusion of skin voxels in the manual segmentation. In the fourth case, the source of  
264 inconsistency was unclear.

265           Based on the Bland-Altman analysis of the muscle (Fig. 6b) the sodium concentration  
266 measurements in this region were highly correlated. However, three cases fell outside of the limit  
267 of agreement. One of these had high levels of intramuscular fat (Fig. 5b). In this scenario, the  
268 manual approach which divides the muscles into five sub-compartments could possibly exclude  
269 slightly more of the intramuscular fat tissue between compartments compared to the automated  
270 method, resulting in a small bias towards lower muscle sodium concentration estimates by the

271 automated method. Another was the case where the tibia was erroneously included in the muscle  
272 region due to poor estimation from the active contour model in the automated method, this  
273 consequently yielded an underestimation of sodium concentrations. The manual segmentation  
274 from the third case was performed on the first slice of the mDixon scan instead of the middle  
275 slice, which was an accidental deviation from the protocol due to human error as is typical with  
276 manual procedures.

277 Overall, the inter-scan comparisons were comparable for both the regions and  
278 segmentation methods (Fig. 7). The correlations between baseline and the follow up for the skin  
279 region is slightly higher for the automated method, hence increased reproducibility, compared to  
280 the manual method. Conversely, the correlations between baseline and the follow up for the muscle  
281 region is the same in the automated and manual methods. It should be noted that the used sub-  
282 dataset is from an ongoing longitudinal study during which some subjects will experience  
283 treatment and time effects, thus we are not strictly measuring reproducibility.

284 Although the automated algorithm performed quite well, there are some limitations. First,  
285 the MR imaging protocol it relies on is fast, but still moderately complex and multi-parametric,  
286 requiring both proton-tuned and sodium-tuned coils. Also, the results still require manual quality  
287 review to identify significant failures such as inclusion of the tibia. Finally, the algorithm did not  
288 reliably exclude the fibula from the muscle region. However, the area of the fibula is relatively  
289 quite small, and we used the median instead of the mean in the muscle region to summarize  
290 sodium quantification more robustly in the presence of a small number of outlier voxels (fibula).  
291 Observed results had trivial errors compared to the manual segmentation that consistently  
292 excluded the fibula (Fig. 7).

293           The global intensity-based thresholding step can be confounded by intensity  
294 inhomogeneity in the MR images, resulting in a threshold that excludes some muscle tissue in  
295 lower intensity regions or includes some background voxels in higher intensity regions. Such  
296 inhomogeneity was present in our data, but not to a degree that affected results compared to  
297 manual segmentation. This issue could be more pronounced in data from other field strengths or  
298 other imaging protocols. Possible solutions would be to utilize a bias field correction [21] or a  
299 local thresholding method so that the intensity-based segmentation is applied more uniformly  
300 across the image.

301           Finally, arbitrary fixed smoothness parameters were chosen for the active contour portion  
302 of the segmentation algorithm, which is a likely cause of the minor errors in identifying the  
303 muscle edges. Developing a dynamic and automated procedure for tuning smoothness to match  
304 specific images may improve results, although we would expect the improvement to be minimal  
305 in terms of the final concentration measurements.

306           The algorithm is applied to the proton Dixon image. The resulting segmentation in this  
307 case were applied to a standard sodium weighted image, but in general could be applied to  
308 images of other physiological parameters. For instance, intracellular or extracellular sodium  
309 concentrations can be measured separately using inversion recovery techniques [1]. Additionally,  
310 to obtain more accurate sodium concentration measurements in the skin region,  $^{23}\text{NaMRI}$  at 7.0  
311 T could be used to acquire higher image resolution [22].

## 312 **Conclusion**

313           In summary, we developed an algorithm that could streamline assessment of  $^{23}\text{NaMRI}$   
314 measurements in the leg in both research and clinical settings. By applying an active contour  
315 model and a global histogram based intensity thresholding method, specific regions of interest

316 were identified which were later used for sodium quantification. This algorithm proved to be  
317 highly comparable to the gold manual segmentation method. For both the skin and muscle  
318 regions, the RMSE was relatively low based on the physiological range and the bias was  
319 approximately zero based on the Bland-Altman analysis. This automated approach is time  
320 efficient, reproducible, and minimizes observer bias and human error. Our results suggest that  
321 this algorithm is an excellent alternative to the manual segmentation methodology.

## 322 **Acknowledgements**

323 This work was conducted in part using the resources of the Advanced Computing Center  
324 for Research and Education at Vanderbilt University, Nashville, TN and the resources of the  
325 Center for Computational Imaging at Vanderbilt University Institute of Imaging Science,  
326 Nashville, TN. We would also like to acknowledge the Human Imaging Core at Vanderbilt  
327 University Institute of Imaging Science for their support.

328

329

330

331

332

333

334

335

336

337

338

## 339 **References**

- 340 1. Madelin G, Regatte RR, Biomedical applications of sodium MRI in vivo. *J Magn Reson*  
341 *Imaging*. 2013 May 30; 38(3):511-529. doi: [10.1002/jmri.24168](https://doi.org/10.1002/jmri.24168)
- 342 2. Boada FE, LaVerde G, Jungreis C, Nemoto E, Tanase C, Hancu I. Loss of cell ion  
343 homeostasis and cell viability in the brain: what sodium MRI can tell us. *Current topics in*  
344 *developmental biology*. 2005 Dec 31;70:77-101, doi: [10.1016/S0070-2153\(05\)70004-1](https://doi.org/10.1016/S0070-2153(05)70004-1)
- 345 3. Cameron IL, Smith NK, Pool TB, Sparks RL. Intracellular concentration of sodium and other  
346 elements as related to mitogenesis and oncogenesis in vivo. *Cancer research*. 1980 May  
347 1;40(5):1493-500.
- 348 4. Hammon M, Grossmann S, Linz P, Kopp C, Dahlmann A, Garlichs C, et al. <sup>23</sup>Na magnetic  
349 resonance imaging of the lower leg of acute heart failure patients during diuretic treatment.  
350 *PLoS One*. 2015 Oct 26;10(10):e0141336.
- 351 5. Wang P, Deger MS, Kang H, Ikizler TA, Titze J, Gore JC. Sex differences in sodium  
352 deposition in human muscle and skin. *Magnetic Resonance Imaging*. 2016 Feb 28;36:93-7.
- 353 6. Ouwerkerk R, Jacobs MA, Macura KJ, Wolff AC, Stearns V, Mezban SD, Khouri NF,  
354 Bluemke DA, Bottomley PA. Elevated tissue sodium concentration in malignant breast  
355 lesions detected with non-invasive <sup>23</sup>Na MRI. *Breast cancer research and treatment*. 2007  
356 Dec 1;106(2):151-60.
- 357 7. Jantsch J, Schatz V, Friedrich D, Schröder A, Kopp C, Siegert I, Maronna A, et al. Cutaneous  
358 Na<sup>+</sup> storage strengthens the antimicrobial barrier function of the skin and boosts  
359 macrophage-driven host defense. *Cell metabolism*. 2015 Mar 3;21(3):493-501.



- 360 8. Dahlmann A, Dörfelt K, Eicher F, Linz P, Kopp C, Mössinger I, et al. Magnetic resonance–  
361 determined sodium removal from tissue stores in hemodialysis patients. *Kidney international*.  
362 2015 Feb 28;87(2):434-41.
- 363 9. Broderick BJ, Dessus S, Grace PA, ÓLaighin G. Technique for the computation of lower leg  
364 muscle bulk from magnetic resonance images. *Medical engineering & physics*. 2010 Oct  
365 31;32(8):926-33.
- 366 10. Kang H, Pinti A, Vermeiren L, Taleb-Ahmed A, Zeng X. Tissue classification for MRI of  
367 thigh using a modified FCM method. In *Engineering in Medicine and Biology Society, 2007*.  
368 *EMBS 2007. 29th Annual International Conference of the IEEE 2007 Aug 22* (pp. 5579-  
369 5584). IEEE.
- 370 11. Urricelqui L, Malanda A, Villanueva A. Automatic segmentation of thigh magnetic  
371 resonance images. *World Academy of Science, Engineering and Technology Congress*. 2009  
372 Oct 20;58:979.
- 373 12. Makrogiannis S, Serai S, Fishbein KW, Schreiber C, Ferrucci L, Spencer RG. Automated  
374 quantification of muscle and fat in the thigh from water-, fat-, and nonsuppressed MR  
375 images. *Journal of Magnetic Resonance Imaging*. 2012 May 1;35(5):1152-61.
- 376 13. Wang C, Guo X, Yao L, Li K, Jin Z. A practical method for muscles extraction and  
377 automatic segmentation of leg magnetic resonance images. In *Complex Medical Engineering*,  
378 *2007. CME 2007. IEEE/ICME International Conference on 2007 May 23* (pp. 885-890).  
379 IEEE.
- 380 14. Harrigan RL, Yvernault BC, Boyd BD, Damon SM, Gibney KD, Conrad BN et al.  
381 Vanderbilt University Institute of Imaging Science Center for Computational Imaging

- 382 XNAT: A multimodal data archive and processing environment. *NeuroImage*. 2016 Jan  
383 1;124:1097-101.
- 384 15. Kass M, Witkin A, Terzopoulos D. Snakes: Active contour models. *International journal of*  
385 *computer vision*. 1988 Jan 1;1(4):321-31.
- 386 16. Otsu N. A threshold selection method from gray-level histograms. *IEEE transactions on*  
387 *systems, man, and cybernetics*. 1979 Jan;9(1):62-6.
- 388 17. Schwanghart W. Getborder. 2008 January; ver 1.0. Available from:  
389 <https://www.mathworks.com/matlabcentral/fileexchange/12303-getborder>
- 390 18. Eddins S. Image overlay. 2016 September; ver 1.2.0.1. Available from:  
391 <https://www.mathworks.com/matlabcentral/fileexchange/10502-image-overlay>
- 392 19. Garcia D. Image segmentation using Otsu thresholding. 2010 March; ver 1.4. Available  
393 from: [https://www.mathworks.com/matlabcentral/fileexchange/26532-image-segmentation-](https://www.mathworks.com/matlabcentral/fileexchange/26532-image-segmentation-using-otsu-thresholding)  
394 [using-otsu-thresholding](https://www.mathworks.com/matlabcentral/fileexchange/26532-image-segmentation-using-otsu-thresholding)
- 395 20. Bland JM, Altman D. Statistical methods for assessing agreement between two methods of  
396 clinical measurement. *The lancet*. 1986 Feb 8;327(8476):307-10.
- 397 21. Vovk U, Pernus F, Likar B. A review of methods for correction of intensity inhomogeneity in  
398 MRI. *IEEE transactions on medical imaging*. 2007 Mar;26(3):405-21
- 399 22. Linz P, Santoro D, Renz W, Rieger J, Ruehle A, Ruff J, Deimling M, Rakova N, Muller DN,  
400 Luft FC, Titze J. Skin sodium measured with <sup>23</sup>Na MRI at 7.0 T. *NMR in biomedicine*. 2015  
401 Jan 1;28(1):54-62.

402  
403

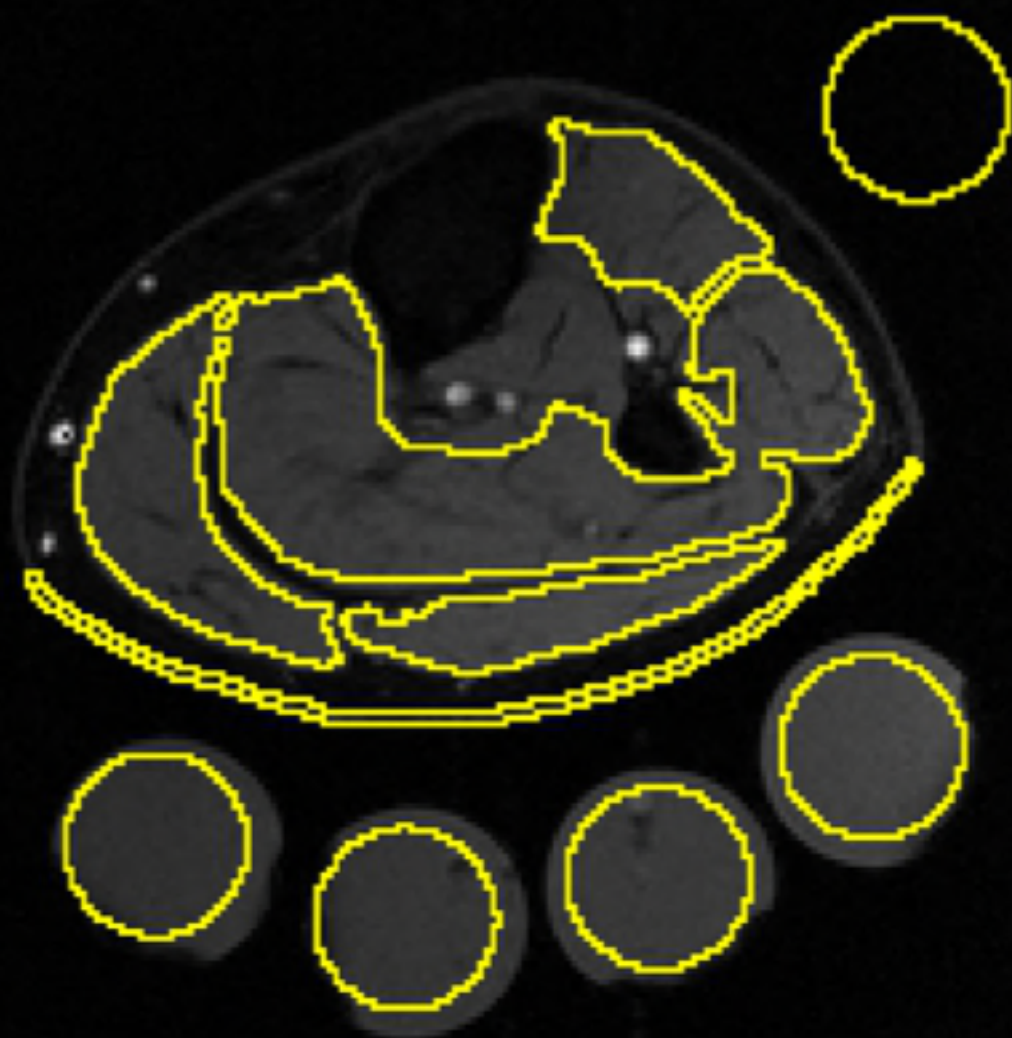

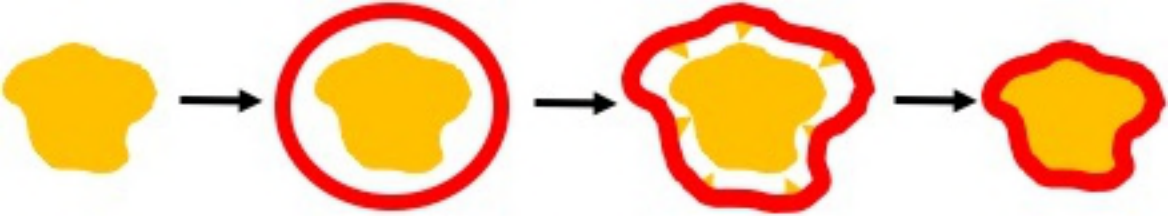

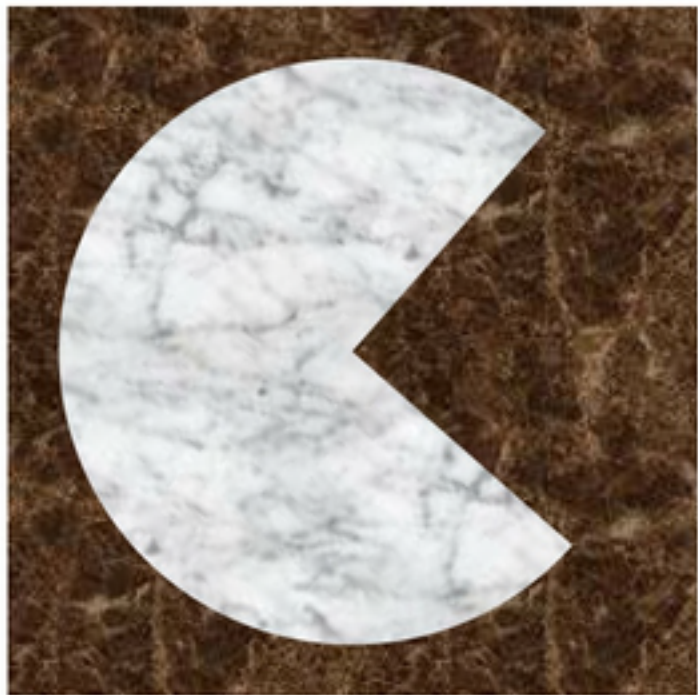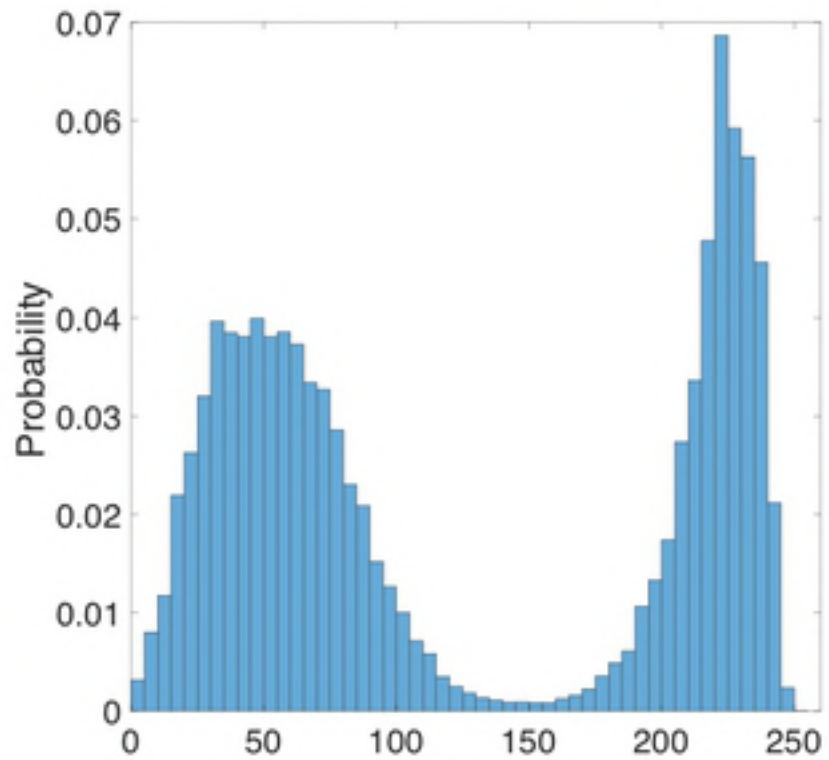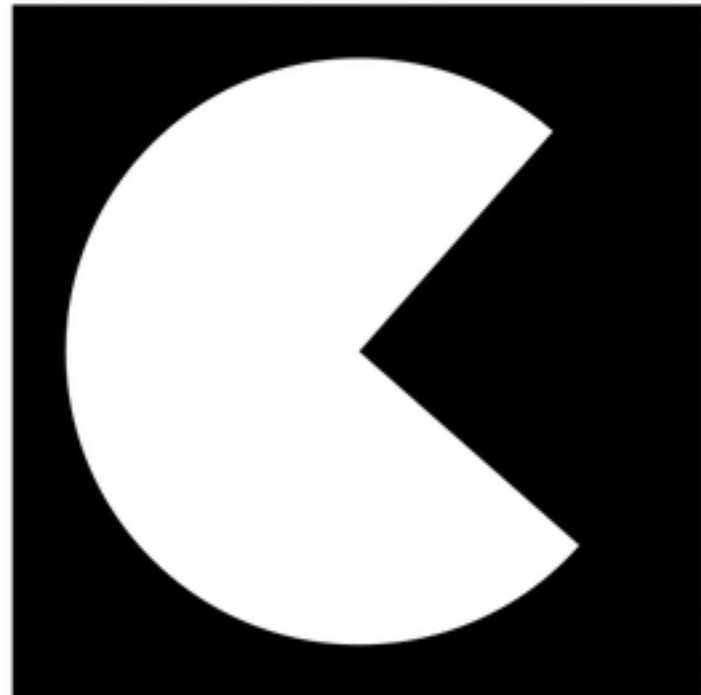

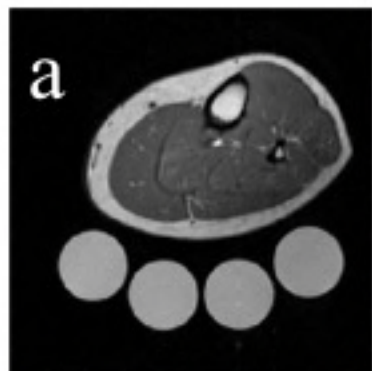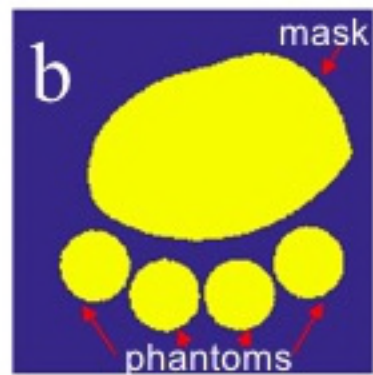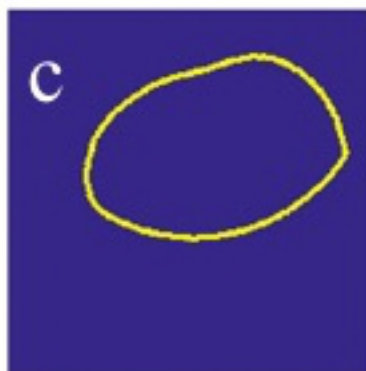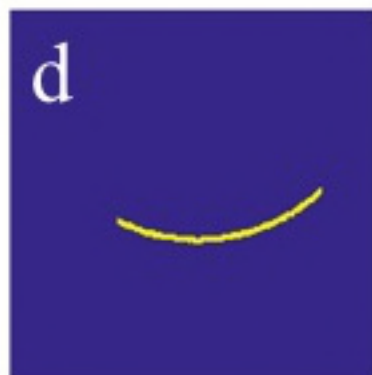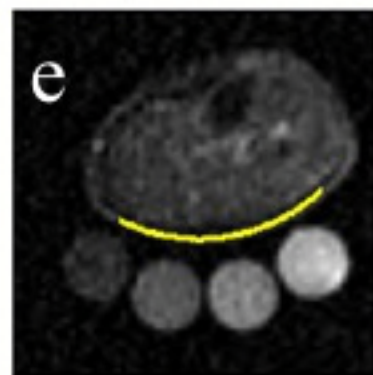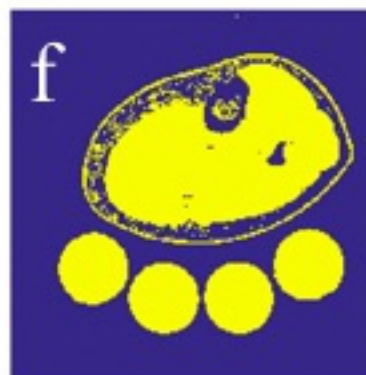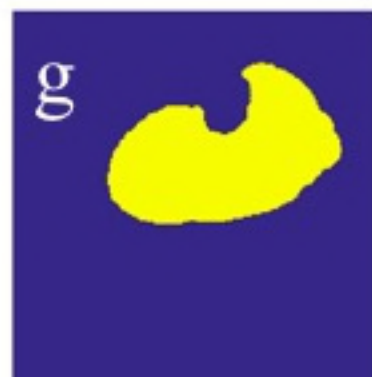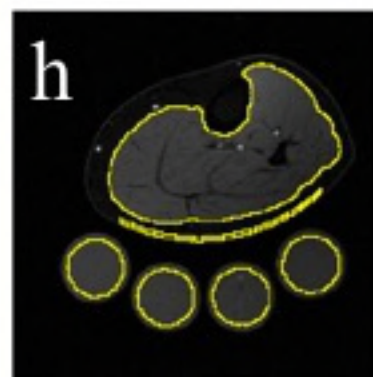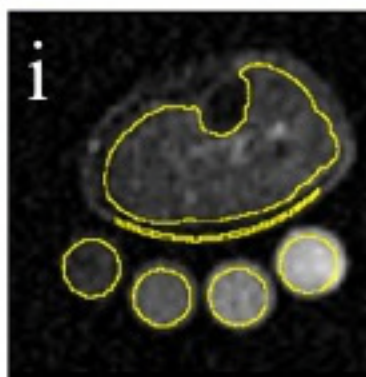

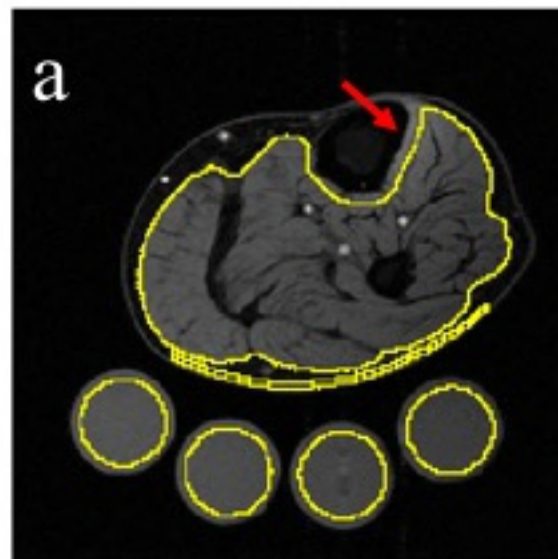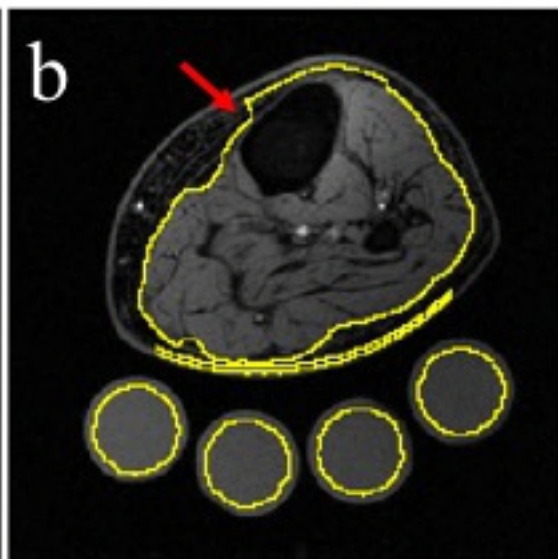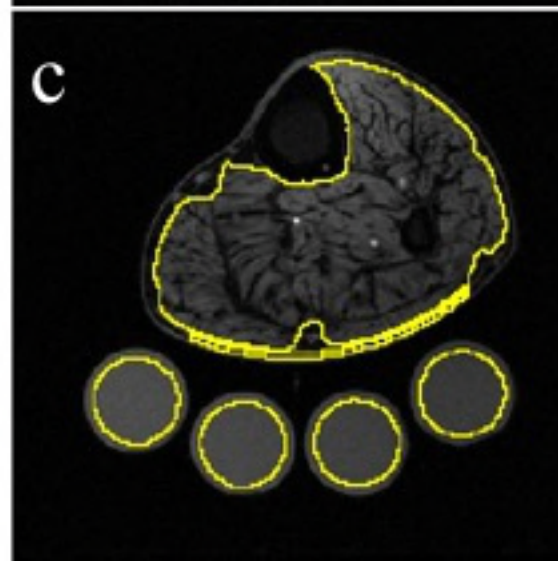

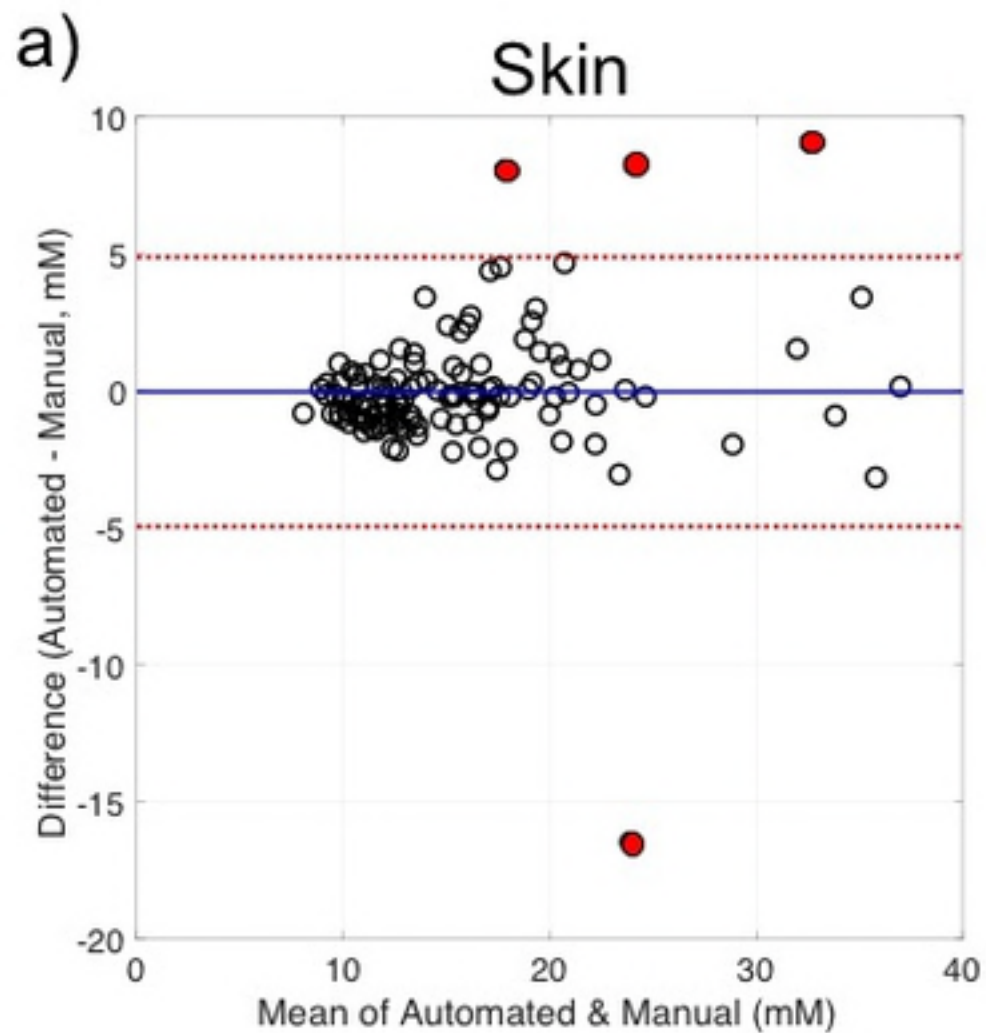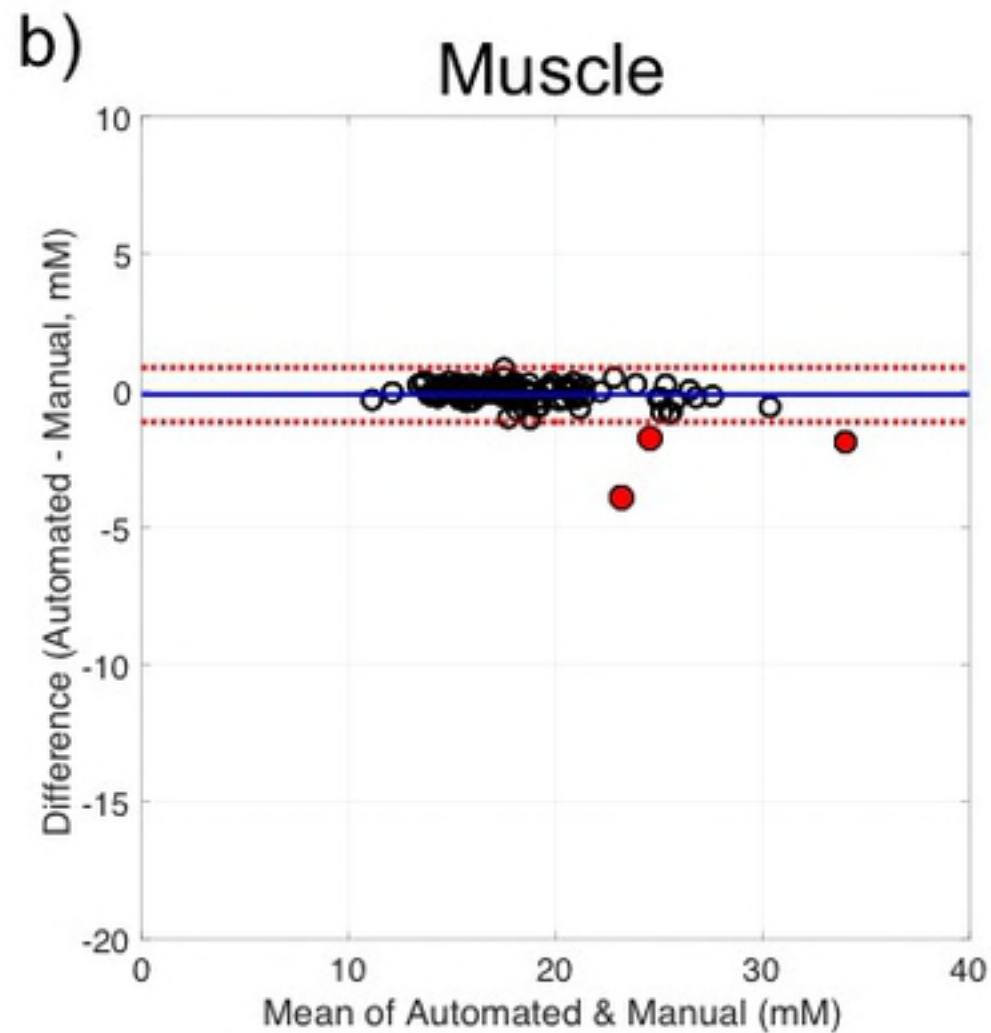



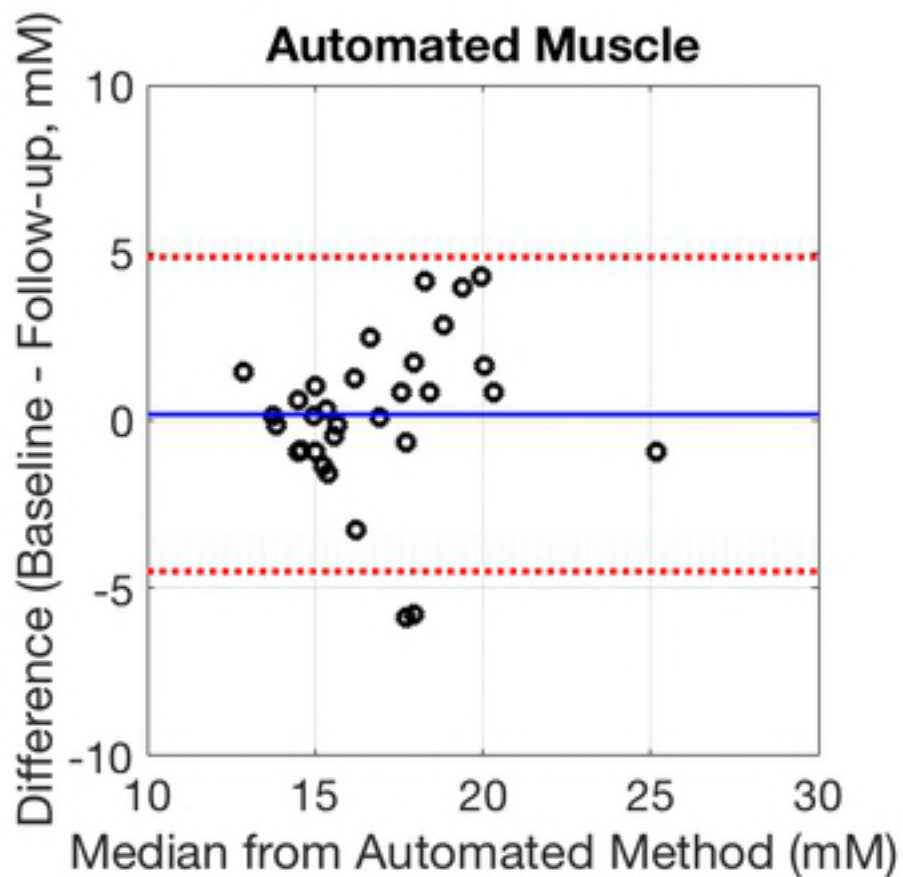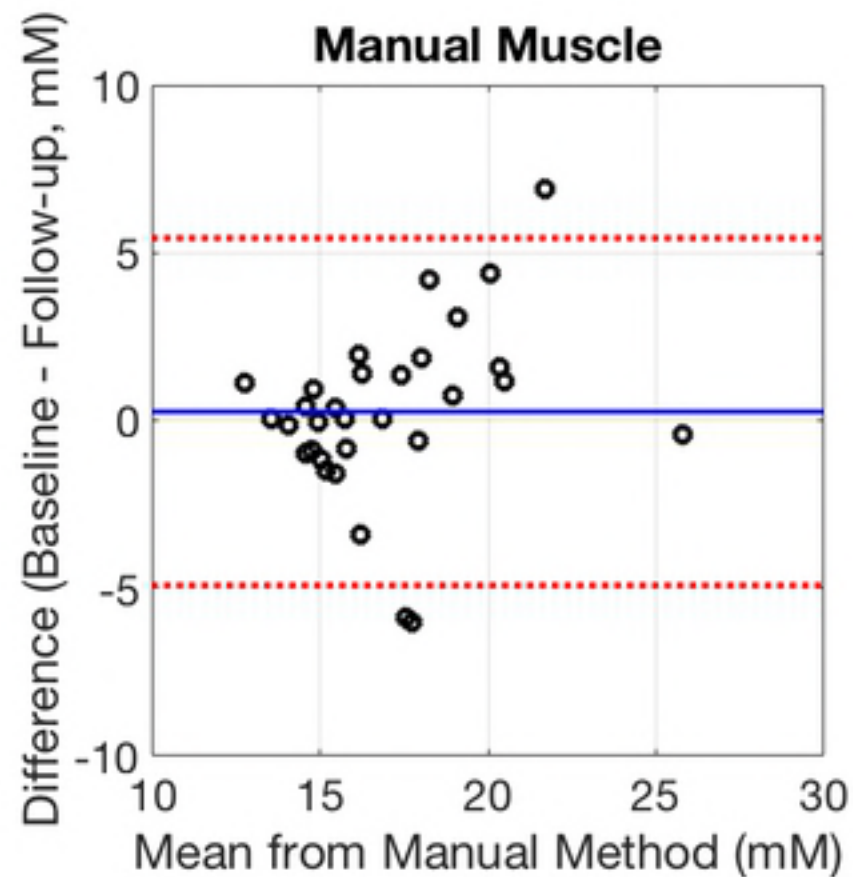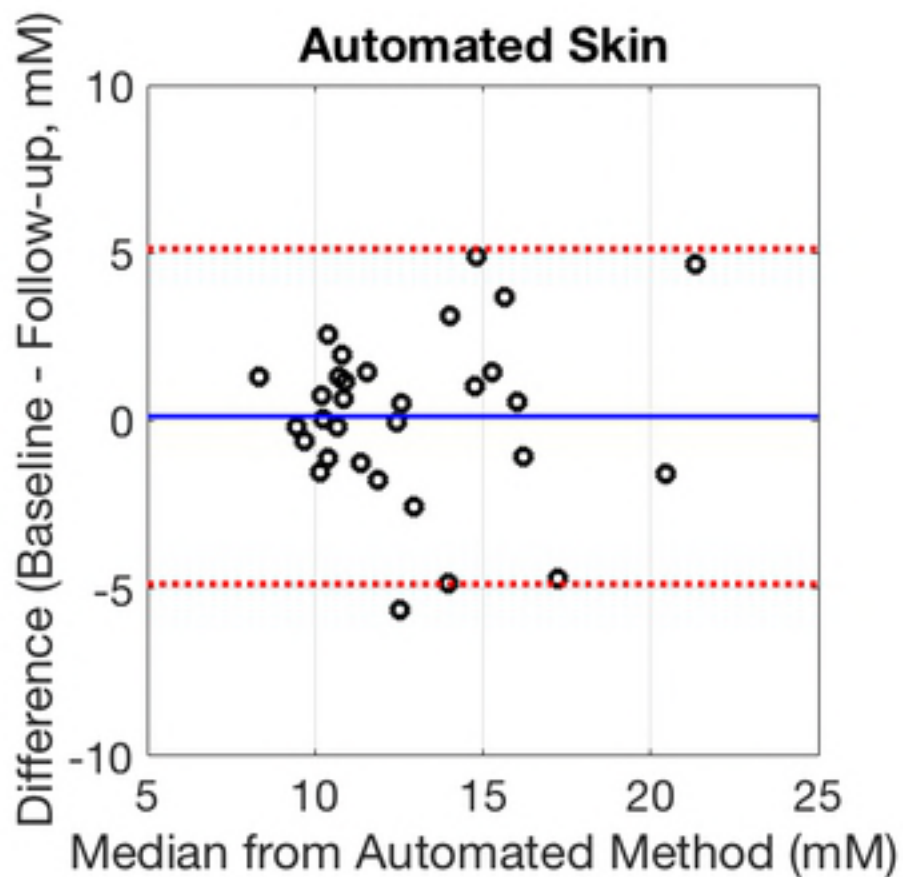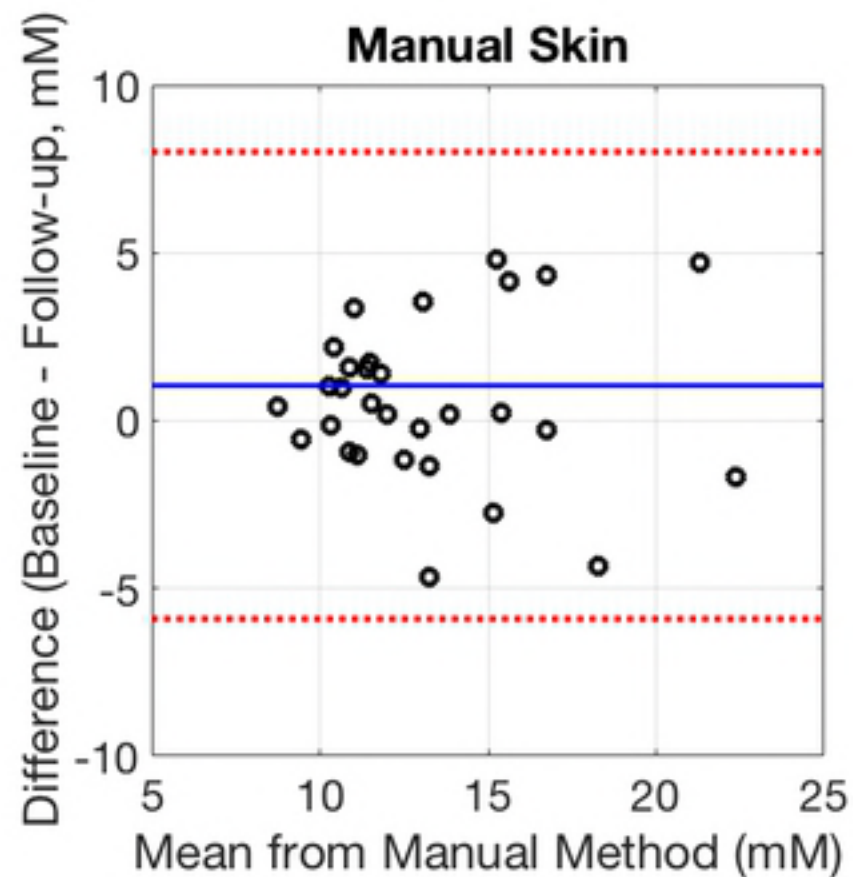

Source: https://www.biorxiv.org/content/10.1101/348136v1.full.pdf
